# Supplementary material for: Elucidation, functional clustering and structural characterization of βTrCP1 substrates through a molecular dynamics study
Source: Royal Society of Chemistry journal article supplement (doi:10.1039/c6mb00189k), 2016-04-26
Supplement: c6mb00189k1.pdf [file c6mb00189k1.pdf]

## Supporting Information

**S1 Table. List of substrates encompassing  $\beta$ TrCP1 phosphodegron motif.** 344 candidate hits having 80% identity with the DSGXXS consensus motif are enlisted with their corresponding UniProt IDs, gene names and peptide sequences.

**S2 Table. H-bonding pattern of  $\beta$ TrCP1 interactions with ARID1A, CDH6 and PCDH7 at different time intervals.** H-bond is represented by “:”,  $\beta$ TrCP1 (bold) and phosphopeptides (unbold).

**S1 Fig. Gene ontology analysis of the identified  $\beta$ TrCP1 substrates.** Gene ontology analysis of substrates was performed by PANTHER program. Out of 344 identified proteins, 343 were assigned with 9 molecular functions (A), 12 Biological process (B) and 37 Pathways (C).

**S2 Fig. Rg plots of individual simulated complexes along the course of 10 ns of MD simulations.** (A) Unbound  $\beta$ TrCP1 (B)  $\beta$ TrCP1-ARID1A, (C)  $\beta$ TrCP1-CDH6 and (D)  $\beta$ TrCP1-PCDH7.
