# Supplementary material for: Elucidation, functional clustering and structural characterization of βTrCP1 substrates through a molecular dynamics study
Source: Royal Society of Chemistry journal article supplement (doi:10.1039/c6mb00189k), 2016-04-26
Supplement: c6mb00189k2.xlsx [file c6mb00189k2.xlsx]

## Sheet: Sheet1
Uniprot ID's	Protein name	Peptide Sequences
Q15057	ACAP2	LDKKSSPSTGSLDSGNESKEKLLKGESALQ
Q5T8D3	ACBD5	NAKTVNGKAESSDSGAESEEEEAQEEVKGA
Q9UGM1	CHRNA9	YNGNQVDIFNALDSGDLSDFIEDVEWEVHG
Q9UKJ8	ADAM21	PYCQHRGYGGSIDSGPASAKRGVFLPLIVIPSL
P35611	ADD1	ASVTGYSFASDGDSGTCSPLRHSFQKQQREKT
P55196	MLLT4	NMWLFNRLVTDPDSGLCSHYWGAIIRQQLG
Q9UL18	AGO1	FRARYHLVDKEHDSGEGSHISGQSNGRDPQ
Q9UKA4	AKAP11	PDSPRPVKASREDSGLFSPIRSSAFSPLGG
Q12802	AKAP13	RKGEEVEPAPIVDSGTVSDQDSCLQSLPDC
P28838	LAP3	PPLVFVGKGITFDSGGISIKASANMDLMRA
Q9UJX6	ANAPC2	DNMVLIDSDDESDSGMASQADQKEEELLLF
Q8TF21	ANKRD24	QRPSPPSALTEDDSGEASSQNSMSSHGKQG
Q9H9E1	ANKRA2	LLESGADPTIETDSGYNSMDLAVALGYRSV
Q96N21	ENTHD2	LLESGADPTIETDSGYNSMDLAVALGYRSV
O15085	ARHGEF11	NSSQNSDLSRVSDSGSHSGSDSHSGASREP
O14497	ARID1A	SEGRLSLDSQEGDSGLDSGTERFPSLSESL
Q8TE56	ADAMTS17	GAPQPNLMPSNPDSGMYSPSRYPPQQQQQQ
P54252	ATXN3	GDFSHARGTALKDSGKGSINSDWKIELPGE
Q9Y2T1	AXIN2	RTFLQQPSGNMDDSGFFSIQVISNALKVWG
Q9P281	BAHCC1	RATASVRSTETVDSGYRSFKRSDPVNPYHI
Q9UIF8	BAZ2B	SEEEEDEEEEEEDSGPLSAEQSAALARSCA
Q6ZW61	BBS12	KKAMESSSNSDSDSGTSSDTSSEGISSSDS
Q6ZUJ8	PIK3AP1	STYIQHHLQNATDSGSPSSYILNEYSKLNS
Q8NDZ0	BEND2	TYVAAVKKAISEDSGCDSVTDTEPEDEKVV
Q9Y6D5	ARFGEF2	VNTMNRSTLLDSDSGQDSSSSSVCIPPKYG
Q9NR09	BIRC6	SSQSPEAIKQLLDSGLPSLLVRSLASFCFS
Q9NUP1	BLOC1S4	KTDLTNGEHARSDSGKVSTENGDAPRERGS
Q14137	BOP1	SSQSPEAIKQLLDSGLPSLLVRSLASFCFS
P51587	BRCA2	EEAEPQGAAWSGDSGTVSQSHSSASGPWED
Q9UPA5	BSN	SDSEESVFSGLEDSGSDSSEDDDEGDEEGE
Q15878	CACNA1E	NSYSYHSDEVYNDSGYLSKNKLDSGIEPVLK
P55285	CDH6	VRRRRSRLPRHSDSGSDSKHDATASSSSAA
Q9ULB5	CDH7	SSLRLSAHRLNSDSGHKSDTHRSGGRERGR
Q8NG31	CASC5	DRHTDMDRIFNIDSGNGSIFTSKLLDRETL
Q9ULV8	CBLC	EQSVYYLPIFIVDSGSPSLSSTNTLTIRVC
Q92793	CREBBP	INHLETQPVSSKDSGIGSVAGKLNLSPSQY
Q6ZRS4	CCDC129	SIYQFHGQATAEDSGNSSDQEGRELELGQV
Q96S94	CCNL2	VEVKPGMKSRFVDSGEMSESFPYRTKALFA
P30203	CD6	HGPQPLTKSVSLDSGFSSICPMGTCHAIPA
Q9NYV4	CDK12	PSRSASPKRRKSDSGSTSGGSKSQSRSRSR
Q4KMG0	CDON	PIQVQAPPPEDSDSGSDSDYEHYDFSAQPP
O94986	CEP152	LPRKENSSVEAKDSGLESKKLPRSVKLEKS
Q8TEP8	CEP192	YSHLATDSVDPADSGNYSCMAGNKSGDVKY
Q8IW35	CEP97	SVCQQPSRKLIVPLSSQQDSGFDSPFVNLD
O15182	CETN3	PSVGTNCGIEPWDSGVTSGLGSVRVPEELK
O14646	CHD1	VAPQEKSLPEFPDSGFHSSLTEQVHSLQHS
O14646	CHD1	EILKAFKLFDDDDSGKISLRNLRRVARELG
O14647	CHD2	RNSSGESSQSDDDSGSASGSGSGSSSGSSS
Q70JA7	CHSY3	DGSSSQSGSSDSDSGSESGSQSESESDTSR
Q8IXQ3	C9orf40	SSHSASEEASGSDSGSQSESEQGSDPGSGH
Q9HAW4	CLSPN	QNVKLVIILFSRDSGQDSSKHIELIKGYQN
Q16281	CNGA3	MAEPSASPSKRRDSGDNSAPSGQEREDHGL
Q7Z7A1	CNTRL	NVISQEEADSPSDSGQGSYETIGPLSEGDS
O75128	COBL	QPGIAMETRGLADSGQGSFTGQGIARLSRL
Q9NZU0	FLRT3	RERNKTRGKMITDSGKFSGSSPAPPSQPQG
Q5VW36	FOCAD	EQKLGSSCSGSGDSGRRSHACGYSNSSGCG
P32314	FOXN2	IKDLNAELFDCKDSGIVSTIQITTAIPNTV
O00409	FOXN3	AALLRKLSAHVDDSGSQSRTFQEVLAYTLS
O94915	FRYL	DTDVDYEDDPLGDSGYASQPCAKISEKGQS
Q5TBA9	FRY	KHSQKEPKDSLGDSGYASQHKKRQHFAKAR
Q8NA03	FSIP1	DFIPDYQPSPMTDSGLSSSSTSSSISLGNN
Q5JY77	GASP1	DFLREDQSSPVPDSGLSSSSTSSSISLGGS
Q96D09	GASP2	RLVELLKDLDEKDSGLSSSEGDQSGWVVPV
P10912	GHR	RSASQFTRDFIRDSGVVSLIETLLNYPSSR
Q5VSY0	GKAP1	RSASQFTRDFIRDSGVVSLIETLLNYPSSR
Q86VQ1	GLCI1	EKSHSNLGVKDGDSGRTSCCEPDILETDFN
P10071	GLI3	PTTASRFALLQVDSGSGSDSEPGKGKGRNT
Q9C091	GRB1L	CSTEDLLYDRDKDSGSSSPLPKYASSPKPN
Q3V6T2	GRDN	RGDIHPRPPPPRDSGSHSQSRSPGRPTQGA
Q96GX5	GWL	ARKLLSQVCAIADSGSQSLDLGHFSKVDFI
Q8TF76	HASP	GSRVHASRPASLDSGRTSTSNSNNNASLHE
Q76N89	HECW1	QLGFHQSNQWAVDSGGISEEHLGKRSLKRN
Q8NG08	HELB	CGPLRLPPFPSRDSGRLSPDLSVCGQPRDG
Q8NDA2	HMCN2	IQRTIATERSEEDSGSQSCEQAPAGGGGGG
Q8NDA2	HMCN3	PADFPSPRKSSGDSGGPSTPSASPLPVVTD
Q8NDA2	HMCN4	GQSLHFPRIQEGDSGLYSCRAENQAGTAQR
Q8NDA2	HMCN5	GRVLTLASARASDSGRYSCVAVSAVGEDRQ
Q8NDA2	HMCN6	GWMLKMTQTQEQDSGLYSCLASNEAGEARR
P49639	HXA1	GPSLQLEAVGAGDSGTYSCVAVSEAGEARR
Q13651	I10R1	GRFLQLQALSTADSGDYSCTARNAAGSTSV
P42701	I12R1	NSFLEYPILSSGDSGTCSARAYPSDHRITT
Q8N6C5	IGSF1	PELKNLDLHGSTDSGFGSTKPSLQTEEPQF
Q8N6C5	IGSF1	ECCFQDPPYPDADSGSASGPRDLRCYRISS
O75054	IGSF3	SADFLLHTVGAEDSGNYSCIYYETTMSNRG
Q15653	IKBB	RADFWMPAVRGEDSGIYSCVYYLDSTPFAA
O00221	IKBE	VYRLFIQNVAVQDSGTYSCHVEEWLPSPSG
P08887	IL6RA	CLGKAADADEWCDSGLGSLGPDAAAPGGPG
P17181	INAR1	RKGPDEAEESQYDSGIESLRSLRSLPESTS
P15260	INGR1	GRRLLLRSVQLHDSGNYSCYRAGRPAGTVH
Q9ULD6	INTU	EDHKKYSSQTSQDSGNYSNEDESESKTSEE
Q8WZA9	IRGQ	DKPHVLVDLLVDDSGKESLIGYRPTEDSKE
Q96ST2	IWS1	EDEDYDFEDRVSDSGSYSSASSDYDDLEPE
Q92628	K0232	DVETLEAPEGRPDSGVPSLRAAGPGLFLGE
Q5VZ46	K1614	HLKKQDLKETFIDSGVMSAIKEWLSPLPDR
Q6NY19	KANK3	SSVYEARCTGERDSGAKSDGFRGKMCSSAS
Q9ULH0	KDIS	FGFCVASGNGRPDSGMPSPLPQPHGWGGLS
Q9ULI4	KI26A	AEPPGSSSGSGDDSGGGSDSGTPGPPSGGD
Q2KJY2	KI26B	LSDALLDKKDSSDSGVRSSESSPNHSLHNE
O43896	KIF1C	GRGGSSWGSADSDSGHDSGVNVGEERPPTG
Q2M1P5	KIF7	LPSPAPLPPSSKDSGVASRESLLQPEVRTP
Q8TBB5	KLDC4	LLLEQQRLYADSDSGDDSDKRSCEESWRLI
Q12918	KLRB1	GERSALSSASGPDSGIESASVEDQAAQGAG
Q8IZD2	KMT2E	TDSEEDSEEVEGAEGGVDDEDSGEESGAED
Q96S38	KS6C1	QQAIYAELNLPTDSGPESSSPSSLPRDVCQ
Q5T7P2	LCE1A	RALLLSDHRKDKDSGGESPCVSCSPSHVQS
Q8N3X6	LCORL	EDDGQDSSPKWPDSGSSSEEECTTSYLTLC
Q8WVC0	LEO1	RLQSSGCCSQPSGGSSCCGGDSGQHSGGCC
Q8N6C5	IGSF1	PKKKLRLPDTGLYNMTDSGTGSCKNSSKPV
Q5TDP6	LGSN	SDADSEAERKDSDSGSDSDSDQENAASGSN
A6NI73	LIRA5	ASGSESDQDERGDSGQPSNKELFGDDSEDE
Q9BU23	LMF2	YIASFFIETGFCDSGILSHSLWDVDRKKNM
Q14693	LPIN1	AADNLSPSQNKSDSGTASHLQDYAVENLIR
Q8IYG6	LRC56	VSGEKRRPASQKDSGAASEQATAAPNPCSS
Q6P9F7	LRC8B	NQSPQSVGSSGVDSGVESTSDGLRDLPSIA
Q9Y2L9	LRCH1	LVPSPPKHPRPRDSGSSSPRWSTDLQSRGR
Q5VUJ6	LRCH2	ILLSSSGCSADIDSGKQSLPYPQPGLESAG
Q96II8	LRCH3	LHQHVEDGKKDSDSGVGSDNGDKRLSATEP
O75427	LRCH4	MEDFYPNKNHGPDSGIGSDNGEKRLSTTEP
P16109	LYAM3	CHEELYSSRPYGALDSGFNSVDSGDKRWSG
Q5XG99	LYSM4	DLFPGHRYDGGLDSGFHSVDSGSKRWSGNE
Q9Y250	LZTS1	YRVRGLDMLRCIDSGHWSAPLPTCEAISCE
Q9BRK4(1)	LZTS2	TSHVYMFKNGSGDSGDSSEEESHRVVLRPR
Q9BRK4(2)	LZTS2	ELKPGLCSGALSDSGRNSMSSLPTHSTSSS
O60299(1)	LZTS3	GWASGCPSGTLSDSGRNSLSSLPTYSTGGA
O60299(2)	LZTS3	PARGVPTGPSHSDSGRSSSSKSTGSLGGRV
Q02978	M2OM	MTPAGGSGSGLSDSGRNSLTSLPTYSSSYS
Q13233	M3K1	GGGSGYQDLGTSDSGRASSKSGSSSSMGRP
Q9UPN3	MACF1	LASYSQSKQFLLDSGYFSDNILCHFCASMI
Q8WXG6	MADD	GGAHLTESVAAPDSGASSPAAAEPGEKRAP
P43361	MAGA8	LDKGRLMLLSRDDSGSGSKTEQSVALLEQK
Q99750	MDFI	PPERDSDSEPTDDSGSDSMDYDDSSSSYSS
Q96KG7	MEG10	STLIMGTLEEVTDSGSPSPPQSPEGASSSL
Q9NQ76	MEPE	GNPLGCTPLLPNDSGHPSELGGTRRAGNGA
Q9NQG6	MID51	YDLLPVRDSSSSPKQEDSGGSSSNSSSSSE
Q10571	MN1	PHSNRRFSSRRRDDSSESSDSGSSSESDGD
O43347	MSI1H	AETARLRALDQADSGCRSLCLKILKAICKS
O43312	MTSS1	GGGGRGRGRRKRDSGHVSPGTFFDKYSAAP
Q765P7	MTSSL	GPMAELYGAANQDSGVSSYISAASPAPSTG
Q92614	MY18A	QAPVRLSSVSSHDSGFISQDAFQSKSPSPM
Q15746	MYLK	TTTARLSSVSSHDSGFVSQDATYSKPPSPM
P54296	MYOM2	IDSDSNRGSVILDSGHLSTASSSDDLKGEE
P41227	NAA10	SHYLCLLKARTRDSGTYSCTASNAQGQLSC
Q7RTR0	NALP9	YVSMTIKGVTSEDSGKYSINIKNKYGGEKI
Q8NFP9	NBEA	EACREEKGLAAEDSGGDSKDLSEVSETTES
O14513	NCKP5	TLRMCVENIFPDDSGCISDYNEKLVYWREL
Q5SYE7	NHSL1	TPKSMINTTGAVDSGSSSSSSSSSFVNGAT
Q6T4R5	NHS	TLDSGIGTFPLPDSGNRSTGRYLCQPDSPED
Q6KC79	NIPBL	EDHDGYCASVHTDSGHGSGNLCNSSDGFGN
Q99457	NP1L3	IHRSKRKVLGRKDSGDMSVRSKSRAPLSSS
Q9GZQ6	NPFF1	PETPKHRHDNRRDSGKPSTEKKPEVSKHKQ
O00624	NPT3	GVAEEEMASSTSDSGEESDSSSSSSSTSDS
Q92823	NRCAM	LHRRVFVVVRPSDSGLPSESGPSSGAPRPG
Q5VST9	OBSCN	TYISTLLHVNIRDSGVLSSLPFIAAASCTI
O75147	OBSL1	GTAYKVRVGAVGDSGFVSSEDVFETGPAMA
Q8NH42	OR4KD	MLELVVRNLRPQDSGRYSCSFGDQTTSATL
Q8NGD5	OR4KE	RHRLVLNGLGLADSGCVSFTADSLRCAARL
Q8NH41	OR4KF	KDTYILQLLVIADSGLLSLVCFLLLLVSYG
Q8NH43	OR4L1	MDTYVLGIIMISDSGLLSLSCFLLLLISYT
Q6ZRI0	OTOG	CIDTYVVSLLIVADSGFLSLSSFLLLVVSYT
P56373	P2RX3	IETYTLELFVIADSGLLSFTCFILLLVSYI
Q8WX93	PALLD	INVGNSLIVFDDDSGNPSPESFLDDKQEVH
Q96JQ0	PCD16	IAALTNPVYPSDQTTAEKQSTDSGAFSIGH
Q6V1P9	PCD23	RNRSPNGESSSPDSGYLSPKNQPSALLSAS
Q9Y5F3	PCDB1	GTPIYTLRALDPDSGVNSRVTFTLLAGGGG
Q9Y5F1	PCDBC	GEFVTRVEALDRDSGVNSKLQFEIMPGASF
O60245	PCDH7	AGYLVTKVVAVDGDSGQNSWLSYHLLKATDL
O60245	PCDH7	GSLVVTVSAWDLDSGTNSELSYTFSHASED
Q9HC56	PCDH9	ATREFNVVIVAVDSGSPSLSSNNSLIVKVG
O95263	PDE8B	HYGLHRLVVQVNDSGQPSQSTTTLVHVFVN
O15018	PDZD2	GTKEFSFKIVASDSGKPSLNQTALVRVKLE
P98160	PGBM	DNNKQIHKIHRDSGDNSQTEPHSFRYKNR
O94880	PHF14	PKCRAEGRAPRADSGPVSPAASRNGMSVAG
O75151	PHF2	GPLLRLNQVSPADSGEYSCQVTGSSGTLEA
Q9P1Y6	PHRF1	EGSGNGSEDASKDSGEGSCSDSEENILEEE
Q13563	PKD2	ICVKDSYTDFHIDSGGASAWYHVLKGEKTF
O94827	PKHG5	GDFEESSVGSSGDSGDDSDSEHGDGTDGED
P14923	PLAK	RSLDDSEEDDDEDSGHSSRRRGSISSGVSY
Q9UPR0	PLCL2	VEPGDTLSSPEFDSGPFSSQSDETSLSTTA
Q68D20	PMS2L	IKVTEWQQTYTYDSGIHSGANTCVPSVSSK
P54278	PMS2	GGGRLGHGRARYDSGGVSNGDCSLGVSGDE
Q9P1A2	PP4RL	PSDPTDRAEVEKDSGHGSTSVDSEGFSIPD
P11117	PPAL	PSDPTDRAEVEKDSGHGSTSVDSEGFSIPD
O14830	PPE2	GALSIWPLTQDLDSGFASGSPAPSSGGNTS
Q5T8A7	PPR26	YASCHIFELYQEDSGNFSVEMYFRNESDKA
Q5VV67	PPRC1	VEKSCPEGDASECPQATNAKDSGCSSPGAH
Q8N755	PQLC3	DQEQDALGSDASDFSDTSTEDSGGSSVVKV
P48634	PRC2A	GGEQVLLHEEAGDSGFVSLSRLGPSLRDKD
O43900	PRIC3	KFAQLQCLWKTRDSGTVSALTWSLSSYTCA
O75569	PRKRA	VHPSGLVPRERSDSGGSSSEPFDRHAPAML
P16471	PRLR	ISDFQRHSISDDDSGCASEEYAWVPPGLKP
Q92620	PRP16	RHRAEAPPLEREDSGTFSLGKMITAKPGKT
Q2VWP7	PRTG	QGMKPTYLDPDTDSGRGSCDSPSLLSEKCE
Q8WUY3	PRUN2	AATPSRSTWEEEDSGYGSSRRSQWESPSPT
A5PKW4	PSD1	HSANSEGSHETGDSGRFSHESNDEIHLSSV
Q8NDX1	PSD4	FEYTGHDPTANKDSGQESESIPEYTAEEER
Q13332	PTPRS	PPAPAPLAPLEPDSGTSSAADGPWTQRGEE
Q09MP3	R51A2	DTGLHSSPPENEDSGEDSSEPEGEGQAWLR
Q96T37	RBM15	PVEMRRINFQTPDSGLRSPLREPGFHFESM
Q9Y4C8	RBM19	PSLEIAKPSYFRDSGTISVPQFPMDLNSKM
P78332	RBM6	SGGSNGSSSGKTDSGGGSRRSLHLDKSSSR
P48378	RFX2	SKPASDYLNFDSDSGQESEEEGAGEDLEEE
Q8NET4	RGAG1	VAVNLATGKRRNDSGDHSDHMHYYQGKKYF
Q8NET4(2)	RGAG1	RYRPAQKTDSLGDSGSHSGLHSTPEQTMAV
Q8NET4(3)	RGAG1	SGGIPTPLMSDLDSGIMSSLLMSSPGSEVM
Q8NET4(4)	RGAG1	SEAMSTPLMLAPDSGELSPILMQDMNPGVM
Q8NET4(5)	RGAG1	SGGIPTPLMSDLDSGIMSSLLMSSPGSEVM
O94955	RHBT3	SGVMSAPPVRALDSGAMSTPLMGAPASGNM
Q9P227	RHG23	FGVMSTPEIKATDSGEASTSHINITASGSK
Q9C0H5	RHG39	EELEEDIRKKLKDSGDVSNVIEKVKCILKT
Q8WYP3	RIN2	EPAGARAHSDNKDSGLSSLESTKARAPSSA
Q92753	RORB	AGRPAAFGTVKEDSGSSSPPGVFLEKDYEI
Q13905	RPGF1	YSEEEDVKTCARDSGYDSLSNRLSILDRLL
Q9Y4G8	RPGF2	IDLPKSEGYYNVDSGQPSPDQSGLDMTGIK
Q9Y4G8	RPGF2	SKSDEQLSSLDRDSGQCSRNTSCETLDHYD
Q8TEU7	RPGF6	VSSSHSGCSITSDSGSSSLSDIYQATESEA
Q8TEU7	RPGF6	QDQGDRASLDAADSGRGSWTSCSSGSHDNI
P47736	RPGP1	VSSSQSGCSIASDSGSSSLSDIYQATESEV
P04843	RPN1	EISQEHIIIEAADSGRGSWTSCSSSSHDNF
P28702	RXRB	KRESPPAGQKTPDSGHVSQEPKSENSSTQS
Q9Y2C5	S17A4	GPFSRYDYQRQPDSGISSIRSFKTILPAAA
Q5K4L6	S27A3	PEPGEAGRDGMGDSGRDSRSPDSSSPNPLP
Q9BXA9	SALL3	TYISSVLQANLRDSGILSALPFVVGCICII
Q8IZD0	SAM14	RALGWDWGPDGGDSGEGSAGEGERAAPGAG
Q9BW04	SARG	EHAAPGEGAEDADSGPESRSGGEETSVCEK
A3KN83	SBNO1	GGSPFLPFSWFTDSGKGSASSGSTTSPTCS
Q9Y2G9	SBNO2	HWLSRHTEAAPGDSGLISCSLQEQRKARKE
Q93073	SBP2L	RKVGGLTGSSSDDSGSESDASDNEESDYES
Q12770	SCAP	PPDITYTLALPSDSGALSALQLEAITYACQ
Q9H4L4	SENP3	SEQGASEADIDSDSGYCSPKHSNNQPAAGA
Q86XK3	SFR1	LTRIPRPGRQRRDSGVGSGLEAQESWERLS
Q2NKQ1	SGSM1	GLRWTPKSPLDPDSGLLSCTLPNGFGGQSG
O43147	SGSM2	LKNLNVCESQSLDSGSCSALQNEFVSEKLP
Q5HYK7	SH319	PNGNLVNGTCSPDSGHPSSHNFSSGLSEHS
Q15464	SHB	VEQQHSVEFDSPDSGLPSSRNYSVASGIQS
Q9P0V8	SLAF8	LSTKVPLKTKKEDSGSNSQVNSLPAEWCEA
Q9H2G2	SLK_	SCFSASSGSLPDDSGSTSDLIRAYRAQKER
Q9H2G2	SLK_	NLSLELGPLESGDSGNFSVLMVDTRGQPWT
Q5SXM2	SNPC4	LPPESENPKENDNDSGTGSTADTSSIDLNL
P08047	SP1	SISSFLSKTKDSGSISLQETRRQKKTLKKT
Q15772	SPEG	CTTATCPIQGAPDSGKCSASSCLDTSNDPD
Q8N0X7	SPG20	PGVALSVGTLPLDSGAGSEGSGTATPSALI
Q9C0H9	SRCN1	LSSRLQRSGSSEDSGGASGRSTPLFGRLRR
Q8IYB3	SRRM1	AAEGHYTVSYGTDSGEFSSVGEEFYRNHSQ
O60284	ST18	SRGSPVRQSFRKDSGSSSVFAESPGGKTRS
Q8WWQ8	STAB2	RQYRRQNQQSSSDSGSSSSSEDERPKRSHV
Q9P2P6	STAR9	NVSVQTVSENLNDSGIQSLKAESDEADECF
Q6ZVD7	STOX1	NNGYIKFSNLIQDSGLLSVITDPIHTPVTL
Q9P2F5	STOX2	CQSLNSSVSNGGDSGILSSPSGTSSGGAPS
Q7Z7C7	STRA8	HLEGTENHSMAGDSGIDSPRTQSLGSNNSV
Q13033	STRN3	RLDSMDSSSITVDSGFNSPRTRESLASNTS
O94901	SUN1	CREPACAEGSVKDSGVDSQGASCSLVSTPE
O15056	SYNJ2	TSQSLVILSSQVDSGLQSNNHINRVVSHPT
Q96I59	SYNM	ACTLGDGEAVGADSGTSSAVSLKNRAARTT
Q15714	T22D1	NNTWLSKSSDPLDSGTRSPKRDPIDPVSAG
Q9Y3Q8	T22D4	DGSSLESLQVVADSGLDSRELNFGSSVEVQ
Q8TC07	TBC15	PSLVGLPQTISGDSGGMSAVSDGSSSSLAA
Q13428	TCOF	MLAISGHLDSDDDSGSGSLVGIDNKIEQAM
Q63HR2	TENC1	QLIQLSTLLRLLDSGFCSYLESQDSGYLYF
Q96RS0	TGS1	TGPSAAQAGKQDDSGSSSEESDSDGEAPAA
Q6ZMP0	THSD4	EPPPPPMLSVSSDSGHSSTLTTEPAAESPG
Q13009	TIAM1	LYNLGLKGYYIRDSGNNSGDQATEEEEGGY
O15393	TICN3	HQVPQHGPLYQSDSGPRSGLQAAEAPIYQL
Q9UKE5	TNIK	YSPTTGRAFVGSDSGSSSTGDAARQGVYEN
Q5GJ75	TP8L3	KNNFYSSQGIVDDSGSTSFMKLNTSAGNVD
Q6ZTW0	TPGS1	EYSGSEEEEEENDSGEPSSILNLPGESTLR
Q9BW30	TPPP3	VDAQPAARSMDSDSGEQSEGEPVTAAGPDV
Q9Y4K3	TRAF6	RRQAVPPPAGFTDSGRQSVSRAAGAAESEE
O95361	TRI16	GKGIAGRQDILDDSGYVSAYKNAGTYDAKV
Q9NQ86	TRI36	LAQAVHSLSVIPDSGYISEVRNFQETIHQL
Q7Z4K8	TRI46	RATAQPPAPLSPDSGSPSPDSGSASPVEEE
Q6ZTA4	TRI67	SPRDAVSPRYEQDSGHDSGSEDACFDSSQP
Q9C026	TRIM9	GAPDVISPRYDPDSGHDSGAEDATVEASPP
Q86TV6	TTC7B	DHADKLSLYSETDSGYGSYTPSLKSPNGVR
Q8N6N2	TTC9B	LDLDKMSLYSEADSGYGSYGGFASAPTTPC
Q2TAM9	TUSC1	IWKSCYNLTNPSDSGRGSSLLDRTIADRRQ
Q70CQ4	UBP31	YIQLTQLKMNRCSLQREDSGAGSQTRDVIG
Q8TEY7	UBP33	RPSGDKEEQPLQEPDSGLRSRDSEPSGPWL
Q96K76	UBP47	LLSARKSKSSQLDSGVPSSPGGRQSAEKSS
Q14146	URB2	TKCGNVMLRQGADSGQISEETWNFLQSIYG
Q495M9	USH1G	EGKKETWDTAEEDSGTDSEYDESGKSRGEM
O75691	UTP20	SCSSILCSGAQRDSGLVSQQLPWLFEKDHM
Q7Z7G8	VP13B	LAAEPAHSEVSTDSGHDSLFTRPGLGTMVF
Q9H270	VPS11	SDNGQPGTPDPADSGGTSAKESECITKPVS
Q8N398	VW5B2	MAETSSRYSGAQDSGIGSDSVKIRIVQIEQ
Q9H977	WDR54	KFLCLPPGITVCDSGRGSLVFGDMEGQIWF
Q9H4A3	WNK1	SPSSGSEGPGQVDSGRGSDTEASEGAEGLG
Q6AWC2	WNK2	SNGYTMVYWHALDSGDASPVQAVFARGIAA
Q9GZV5	WWC2	QPSISVLSDGTVDSGQGSSVFTESRVSSQQ
Q96MU7	YTDC1	ISLIENQILLDSDSGGASQSLSEDKDLNEC
Q9HC78	ZBT20	KKILPESFFKEPDSGSHSRQSSTDSSGGHP
Q8NAP8	ZBT8B	EGNDYDTRSEASDSGSESVSFTDGSVRSGS
Q5D1E8	ZC12A	EGTESEPKGESFDSGVSSSIGTEPDSVEQQ
Q9C0B9	ZCHC2	GYFRALLIHYIQDSGRHSTASLDIVTSDAF
Q9C0B5	ZDHC5	LDSLPYVSQDCLDSGIGSLESQMSELWGVR
P15822	ZEP1	EEKDRDTDSNSEDSGNPSTTRFTGYGSVNQ
P31629	ZEP2	PLPGREEEPGLGDSGIQSTPGSGHAPRTSS
Q15911	ZFHX3	GKLLSPRSLGSTDSGYFSRSESADQTVSPP
Q8N5A5	ZGPAT	LNLLSPHSKGSTDSGYFSRSESAEQQISPP
Q5H9K5	ZMAT1	GPASPVEGPKDPSCPKDSGLTSVGTDTFRL
Q9UDV7	ZN282	CPSLAVVGSDAVDSGTCSSAFAGWEVHTRG
O75128(2)	ZN292	SGLHKLFPSRDADSGGDSQEESELDDQEEP
Q8N3J3	C17orf53	VGSCFASEDTTEDSGVMSSPSDIVSLDSQQ
Q68DQ2	CRYBG3	VTFIGEVSDDPVDSGLFSNRNNNAGSFDSE
Q0VDD7	C19orf57	VTPNNLVHIYSPDSGDGSFLKPSQPFPKDS
P07333	CSF1R	GPHLTGLELLSFDSGNLSKDCSSILSQDPN
Q5JQC4	CT47A1	APGSGESMMGAGDSGHASPDTGPCVNQKQE
P0C2W7	CT47B1	KNIHLEKKYVRRDSGFSSQGVDTYVEMRPV
Q05D32	CTDSPL2	AEAAGAGNQEGGDSGPDSSDVVPAAEVVGV
Q8TDD1	DDX54	AEAAGAGNQEGGDSGPDSSDMVPAAEVVGV
Q7L2E3	DHX30	GRDIPPLTAPVTPDSGYSSAHAEATYEEDW
Q12959	DLG1	LGRVPQSVVDEEDSGLQSTLEASLELRGLA
Q15700	DLG2	RLQSDDILPLGKDSGPLSDPITGKPYVPLL
O95886	DLGAP3	YVRALFDYDKTKDSGLPSQGLNFKFGDILH
Q6E0U4	DMKN	YVRAMFDYDKSKDSGLPSQGLSFKYGDILH
Q9Y5R6	DMRT1	DSWIERGSRSLPDSGRASPCPRDGEWFIKM
Q8N350	DOS	GGSSGNSGGSRGDSGSESSWGSSTGSSSGN
Q8N350	DOS	ARASVFSPPSSQDSGLVSLSSSSPISNKST
O60469	DSCAM	LPPLKIVTIHECDSGEASSATTPHPATSPK
P56555	DSCR4	PKDGEARRLLQMDSGYASIEGRGAGDDTEP
Q16254	E2F4	ISTLQILPTVREDSGFFSCHAINSYGEDRG
O00418	EEF2K	SCLSFSLPASPTDSGLASPTIITREGQQFW
Q8N8Q3	ENDOV	ITVSGGPGTDSKDSGELSSLPLGPTTLDTR
Q58FF3	HSP90B2P	HLDNHRESENSGDSGYPSEKRGELDDPEPR
Q5JZY3	EPHA10	LPGPPTPRSPKAQRPVACPKGDSGESSALC
Q12929	EPS8	MPKNLNFVKGVVDSGGLSLNVSCETLQQHK
Q5T890	ERCC6L2	PLVLRLRWLPPADSGGRSDVTYSLLCLRCG
Q8IYD1	GSPT2	LQEIMRRRQEKISAAASDSGVESFDEGSSH
Q8IYI6	EXOC8	TKKSPVSSTQEIDSGKNSQASEDTVTSRSL
Q96DZ1	ERLEC1	MDSGSSSSDSAPDCWDQVDMESPGSAPSGD
Q96AP7	ESAM	TAREFEIDFAGTDSGCYSAFVVWARSAMGM
B1AK53	ESPN	YGKHVHQYHEDKDSGKTSVVVGTWNQEEHI
Q969W3	FAM104A	NLSLRLEGLQEKDSGPYSCSVNVQDKQGKS
Q9P2D6	FAM135A	RDPSAELEAKQPDSGMSSPNTTVSVQPLNF
Q49AJ0	FAM135B	FQDSWDTESSGSDSGGSSSSSSSSINSPDR
Q15018	FAM175B	DISATYASSRFSDSGVESEPSSFATHPNTD
Q16875	PFKFB3	SGVIKRSSSIISDSGIESEPSSVAWSEARS
Q8NBR6	FAM63B	GADLPPPQRAAGDSGEDSDDSDYENLIDPT
Q8IYD8	FANCM	ENEHNLQGRIGGDSGLSSRGKKFASALSKF
Q8TDW7	FAT3	GPCSSSAGLDLKDSGLESPAAAEAPLRGQY
Q6V0I7	FAT4	NKSTSSLAGNVLDSGYNSFNDEKSVSSNLF
Q6V0I7	FAT4	LVQHCTLKVRSIDSGFPSLSSEVLVHIYIS
Q4G163	FBXO43	DTVVFKAQATDPDSGPNSYIEYTLLNPLGN
Q6PJ61	FBXO46	TLPIYNLSVLAVDSGTPSATGSASLLVTLE
Q9UKT4	FBXO5	SPEVRGSISTPEDSGFNSLSLEKSEDSLSD
O14526	FCHO1	FRISNGREPRAPDSGLPSGGGGRPGCAYPG
P07332	FES	EIEALETSRLYEDSGYSSFSLQSGLSEHEE
P98174	FGD1	SPFSSSSPENVEDSGLDSPSHAAPGPSPDS
Q5JSP0	FGD3	EYAGLLHHMSLQDSGGQSRAISPDSPISQS
P22607	FGFR3	PGPRDGEKVPNRDSGIDSISSPSNSEETCF
Q2V2M9	FHOD3	GELSGSLKIPNRDSGIDSPSSSVAGENFPC
Q5D862	FLG2	PQRLQVLNASHEDSGAYSCRQRLTQRVLCH
